# Supplementary material for: Study of streptomycin-induced ototoxicity: protocol for a longitudinal study
Source: PubMed Central journal article supplement (PMC4912548; doi:10.1186/s40064-016-2429-5), 2016-06-17
Supplement: 40064_2016_2429_MOESM1_ESM.pdf [file 40064_2016_2429_MOESM1_ESM.pdf]

## Drugs tables

### ADULTS

#### Category 1 (6 months) Regimen for New Cases: 2RHZE/4RH

| Regimen                                                                         | Pre-treatment weight |         |         |         |
|---------------------------------------------------------------------------------|----------------------|---------|---------|---------|
|                                                                                 | >70kg                | 55-70kg | 38-54kg | 21-37kg |
| Intensive phase (2 months):<br>Combined tablet of RHZE (150mg+75mg+400mg+275mg) | 5                    | 4       | 3       | 2       |
| Continuation phase (4months):<br>Combined tablet of RH (150mg + 75mg)           | 5                    | 4       | 3       | 2       |

#### Category 1 (8months) Regimen for New Cases: 2 RHZE/ 6EH

| Regimen                                                                         | Pre-treatment weight |         |         |         |
|---------------------------------------------------------------------------------|----------------------|---------|---------|---------|
|                                                                                 | >70kg                | 55-70kg | 38-54kg | 21-37kg |
| Intensive phase (2 months):<br>Combined tablet of RHZE (150mg+75mg+400mg+275mg) | 5                    | 4       | 3       | 2       |
| Continuation phase (6months):<br>Combined tablet of EH (400mg + 150mg)          | 3                    | 3       | 2       | 1       |

### CHILDREN

#### Category 1 Regimen for New Cases: 2 RHZ+E/ 4EH (0-14years)

| Regimen                                                                                     | Pre-treatment weight |        |        |
|---------------------------------------------------------------------------------------------|----------------------|--------|--------|
|                                                                                             | 15-20kg              | 8-14kg | <7kg   |
| Intensive phase (2 months):<br>Combined tablet of RHZ (60mg+30mg+150mg)<br>Ethambutol 100mg | 3<br>3               | 2<br>2 | 1<br>1 |
| Continuation phase (4months):<br>Combined tablet of RH (60mg + 30mg)                        | 3                    | 2      | 1      |

## The CAT 2 regimen remains 8 months: daily supervision

### ADULTS

#### Category 2 Regimen for Relapses, Failure, RAD and Others: 2SRHZE/RHZE/5RHE

| Regimen                                                                                                                             | Pre-treatment weight |             |                |               |
|-------------------------------------------------------------------------------------------------------------------------------------|----------------------|-------------|----------------|---------------|
|                                                                                                                                     | >70kg                | 55-70kg     | 38-54kg        | 21-37kg       |
| Intensive phase (3 months):<br>Combined tablet of RHZE (150mg+75mg+400mg+275mg)<br>Add in the first 2 months daily:<br>Streptomycin | 5<br>1 gram          | 4<br>1 gram | 3<br>0.75 gram | 2<br>0.5 gram |
| Continuation phase (5months):<br>Combined tablet of RHE (150mg+75mg+275mg)                                                          | 5                    | 4           | 3              | 2             |

i. Streptomycin should NOT be given to pregnant women.

ii. Patients >45 years should not be given more than 0.75g of streptomycin irrespective of weight
